# Supplementary material for: Designing thickness-insensitive cathode interlayers via constructing noncovalently conformational locks for highly efficient non-fullerene organic solar cells
Source: Royal Society of Chemistry journal article supplement (doi:10.1039/d3ta07050f), 2023-12-18
Supplement: d3ta07050f1.pdf [file d3ta07050f1.pdf]

## ***Electronic supplementary information***

### **Designing Thickness-Insensitive Cathode Interlayers via Constructing Noncovalently Conformational Locks for Highly Efficient Non-fullerene Organic Solar Cells**

Haolan Zheng<sup>a, b</sup>, Lin Hu<sup>\*a</sup>, Xiaotian Hu<sup>\*c</sup>, Hongxiang Li<sup>d</sup>, Jianwei Quan<sup>a, b</sup>, Yingzhi Jin<sup>a</sup>, Xinxing Yin<sup>a</sup>, Jiaying Song<sup>a</sup>, Zhen Su<sup>a</sup>, Dan Zhou<sup>\*b</sup> and Zaifang Li<sup>\*a</sup>

<sup>a</sup> China-Australia Institute for Advanced Materials and Manufacturing (IAMM), Jiaying University, Jiaying 314001, China

<sup>b</sup> Key Laboratory of Jiangxi Province for Persistent Pollutants, Control and Resources Recycle, Nanchang Hangkong University, 696 Fenghe South Avenue, Nanchang 330063, China

<sup>c</sup> Institute of Polymers and Energy Chemistry (IPEC)/Jiangxi Provincial Key Laboratory of New Energy Chemistry, Nanchang University, 999 Xuefu Avenue, Nanchang 330031, China.

<sup>d</sup> College of Polymer Science and Engineering, State Key Laboratory of Polymer Materials Engineering, Sichuan University, Chengdu 610065, China

\*Corresponding author: [hulin@zjxu.edu.cn](mailto:hulin@zjxu.edu.cn), [happyhu@ncu.edu.cn](mailto:happyhu@ncu.edu.cn),  
[zhoudan@nchu.edu.cn](mailto:zhoudan@nchu.edu.cn), [zaifang.li@zjxu.edu.cn](mailto:zaifang.li@zjxu.edu.cn)

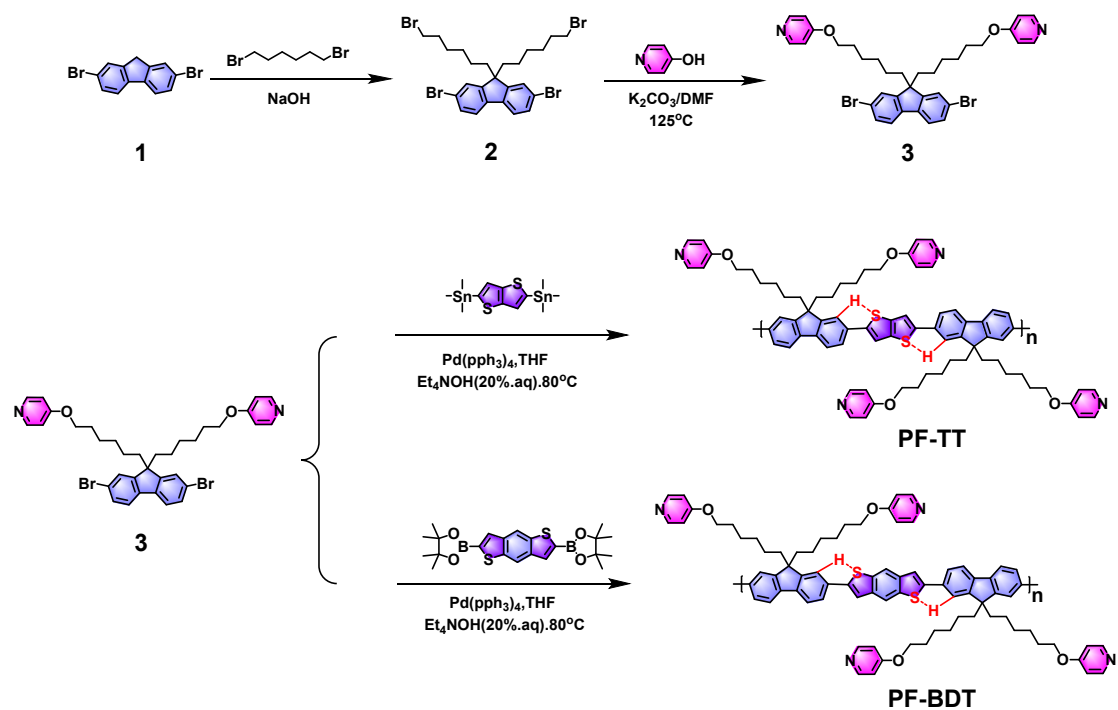

**Scheme S1.** The synthetic routes of PF-TT and PF-BDT.

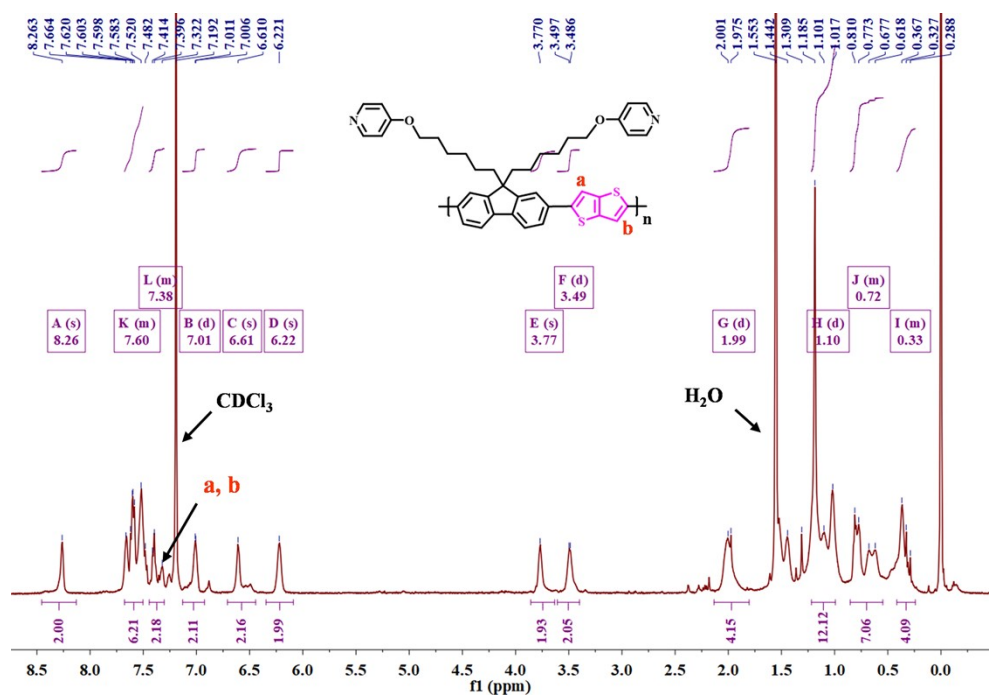

**Fig. S1** The <sup>1</sup>H NMR spectrum of PF-TT. CDCl<sub>3</sub> is used as the deuterium reagent.

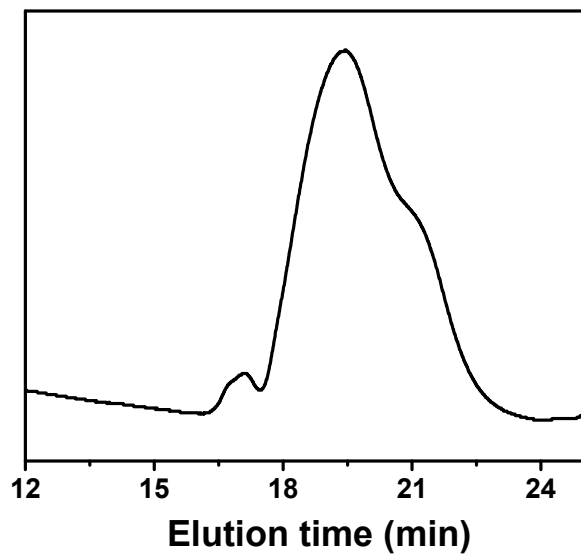

**Fig. S2** GPC trace of PF-TT. THF is used as the eluent.

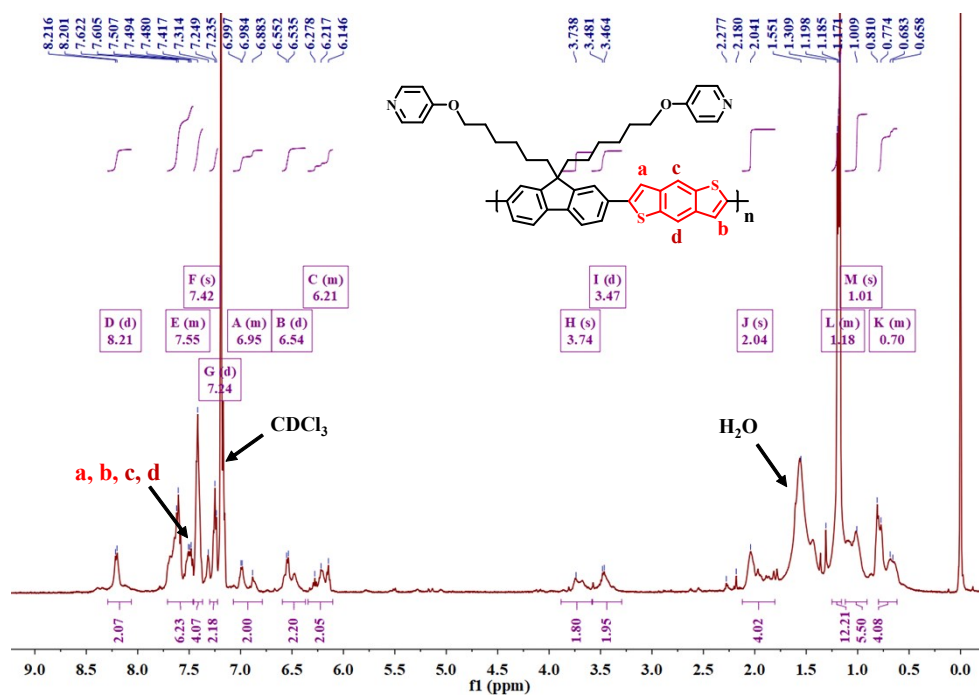

**Fig. S3** The  $^1\text{H}$  NMR of PF-BDT.  $\text{CDCl}_3$  is used as the deuterium reagent.

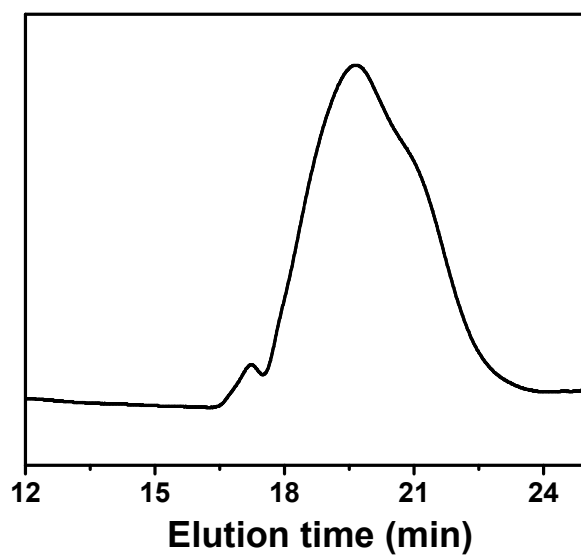

**Fig. S4** GPC trace of PF-BDT. THF is used as the eluent.

**Table S1.** UV-vis absorption and electrochemical properties of the three CILs.

| CIL    | $\lambda_{\text{onset}}$ (nm) | ${}^aE_{\text{g}}^{\text{opt}}$ (eV) | ${}^bE_{\text{HOMO}}$ (eV) | ${}^bE_{\text{LUMO}}$ (eV) |
|--------|-------------------------------|--------------------------------------|----------------------------|----------------------------|
| PF-TT  | 498                           | 2.49                                 | -5.46                      | -3.46                      |
| PF-BDT | 480                           | 2.58                                 | -5.51                      | -3.49                      |
| PDINO  | 623                           | 1.99                                 | -5.34                      | -3.25                      |

$${}^aE_{\text{g}}^{\text{opt}} = 1240/\lambda_{\text{onset}}$$

$${}^bE_{\text{HOMO}} = -e(E_{\text{onset,ox}} + 4.37 \text{ eV})$$

$${}^bE_{\text{LUMO}} = -e(E_{\text{onset,red}} + 4.37 \text{ eV})$$

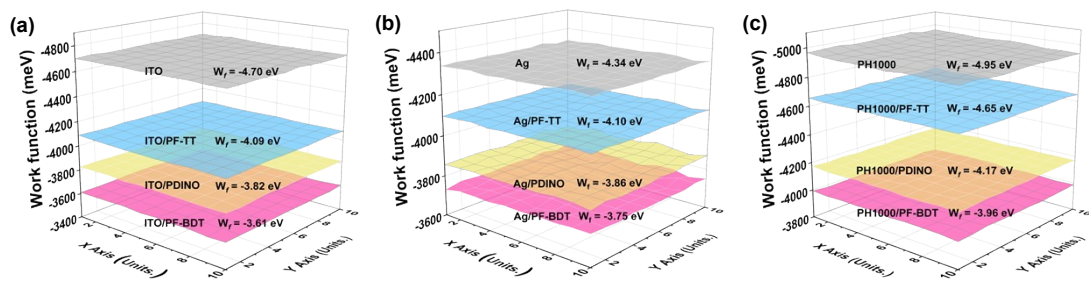

**Fig. S5** Source data for the measured  $W_f$  of the conducting materials (ITO, Ag, PH1000) with and without the surface modifiers.



**Table S2.**  $W_f$  changes of ITO, Ag and PH1000 modified with and without different CIL.

|                       | Bare                 | PF-TT                | PF-BDT               | PDINO                |
|-----------------------|----------------------|----------------------|----------------------|----------------------|
| ITO                   | $-4.70 \pm 0.004$ eV | $-4.08 \pm 0.005$ eV | $-3.61 \pm 0.005$ eV | $-3.82 \pm 0.004$ eV |
| Ag                    | $-4.34 \pm 0.004$ eV | $-4.10 \pm 0.004$ eV | $-3.75 \pm 0.006$ eV | $-3.86 \pm 0.006$ eV |
| PEDOT:PSS<br>(PH1000) | $-4.95 \pm 0.009$ eV | $-4.65 \pm 0.004$ eV | $-3.99 \pm 0.004$ eV | $-4.17 \pm 0.004$ eV |

The  $\pm$  refers to the standard deviation from 100 values.

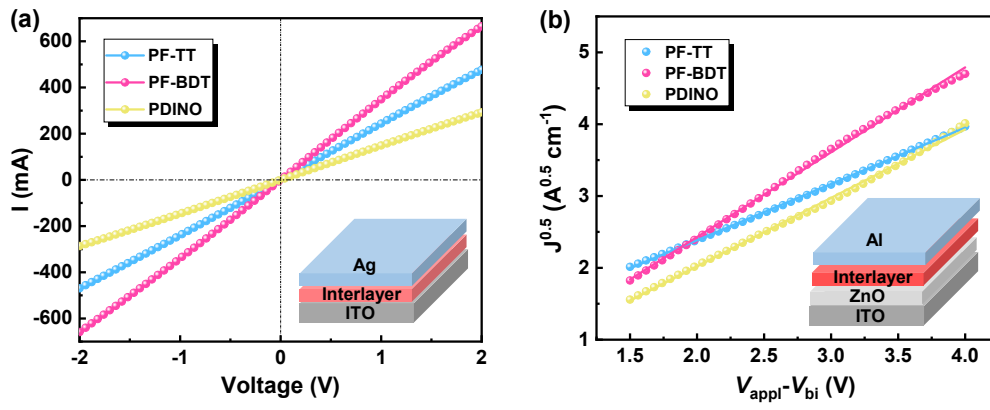

**Fig. S6 (a)** Conductivity and **(b)** electron mobility of the devices with a structure in the inset based on different interlayer.

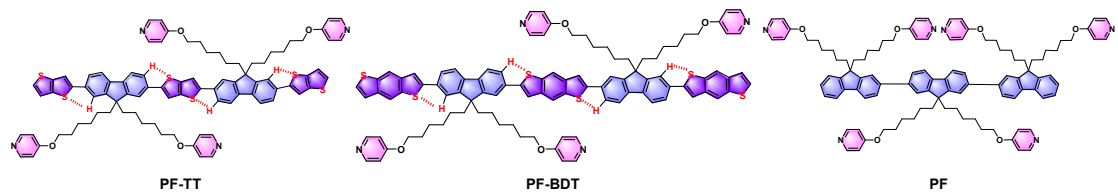

**Fig. S7** Chemical structure formula of PF, PF-TT and PF-BDT used for DFT calculations.

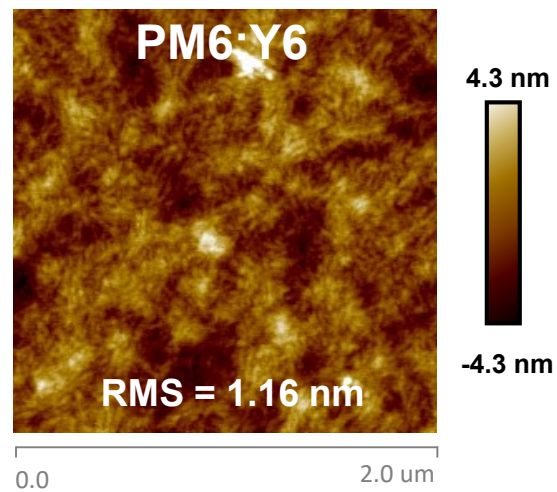

**Fig. S8** AFM image of the bare PM6:Y6 active layer film.

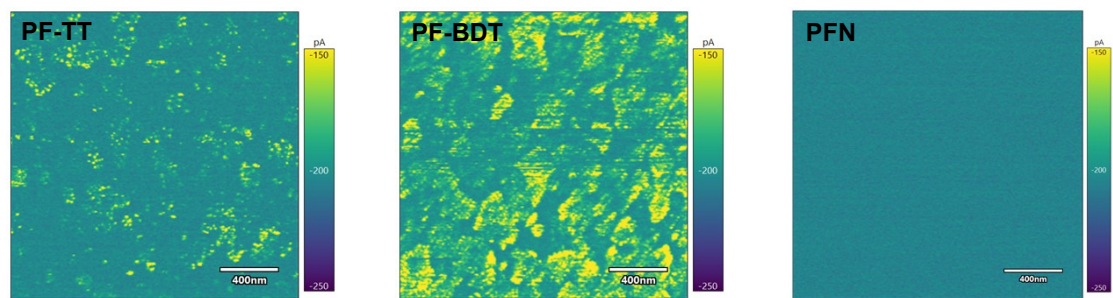

**Fig. S9** The current-sensing AFM (C-AFM) of the PF-TT, PF-BDT and PFN thin films. The thickness of the films is  $\sim 50$  nm.

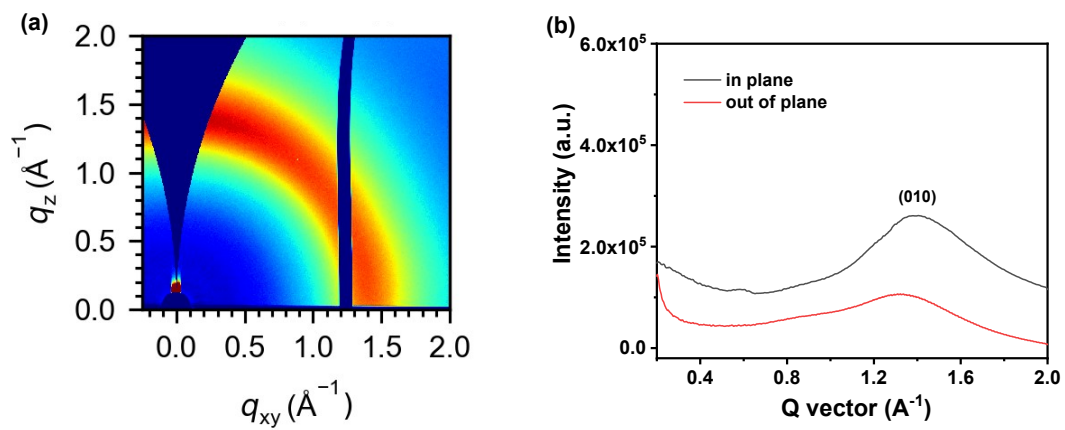

**Fig. S10** (a) 2D GIWAXS images and (b) 1D GIWAXS line curves of the PFN film used for comparison.

**Table S3.** Molecular orientation and crystallinity information of 2D GIWAXS.

| CIL    | 010 direction  | Peak ( $\text{\AA}^{-1}$ ) | FWHM ( $\text{\AA}^{-1}$ ) <sup>a</sup> | <i>d</i> -spacing ( $\text{\AA}$ ) | Coherence length ( $\text{\AA}$ ) |
|--------|----------------|----------------------------|-----------------------------------------|------------------------------------|-----------------------------------|
| PF-TT  | ( <i>IP</i> )  | 1.44                       | 0.39                                    | 4.36                               | 14.33                             |
|        | ( <i>OOP</i> ) | 1.41                       | 0.33                                    | 4.45                               | 16.93                             |
| PF-BDT | ( <i>IP</i> )  | 1.35                       | 0.37                                    | 4.65                               | 15.11                             |
|        | ( <i>OOP</i> ) | 1.34                       | 0.42                                    | 4.68                               | 13.30                             |
| PFN    | ( <i>IP</i> )  | 1.40                       | 0.57                                    | 4.48                               | 9.80                              |
|        | ( <i>OOP</i> ) | 1.31                       | 0.54                                    | 4.79                               | 10.35                             |

<sup>a</sup>FWHM = full-width at half-maximum.

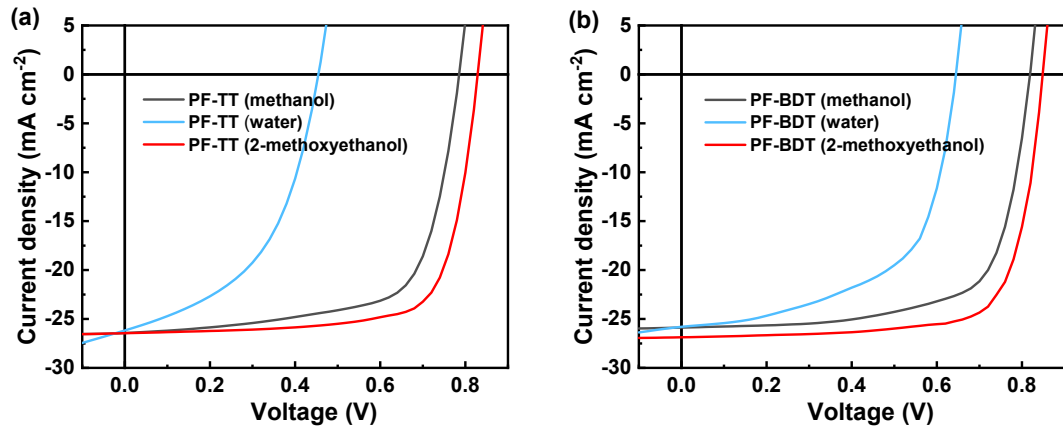

**Fig. S11**  $J$ - $V$  curves of PM6:Y6-based devices with PF-TT and PF-BDT as CIL derived from methanol, water or 2-methoxyethanol, respectively.



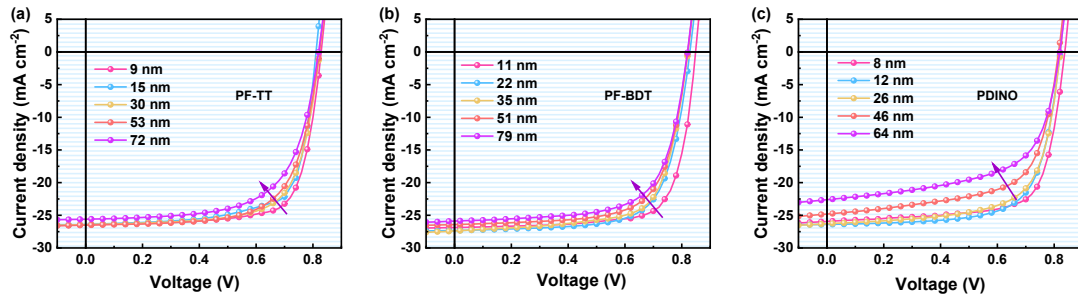

**Fig. S12**  $J$ - $V$  curves of PM6:Y6-based devices with (a) PF-TT, (b) PF-BDT and (c) PDINO at different film thickness.

**Table S4.** Parameters of PM6:Y6-based devices with different concentrations of PF-TT, PF-BDT and PDINO. The thickness of the films are determined by a step profiler.

| CIL    | Concentration | Thickness | $V_{oc}$ (V) | $J_{sc}$ (mA cm <sup>-2</sup> ) | FF (%) | PCE (%) |
|--------|---------------|-----------|--------------|---------------------------------|--------|---------|
| PF-TT  | 1 mg/mL       | 9 nm      | 0.83         | 26.46                           | 74.08  | 16.27   |
|        | 2 mg/mL       | 15 nm     | 0.82         | 26.42                           | 71.63  | 15.52   |
|        | 3 mg/mL       | 30 nm     | 0.82         | 26.41                           | 69.92  | 15.30   |
|        | 4 mg/mL       | 53 nm     | 0.82         | 26.50                           | 67.99  | 14.82   |
|        | 5 mg/mL       | 72 nm     | 0.82         | 25.60                           | 64.99  | 13.64   |
| PF-BDT | 1 mg/mL       | 11 nm     | 0.85         | 26.88                           | 74.80  | 17.09   |
|        | 2 mg/mL       | 22 nm     | 0.83         | 27.32                           | 70.71  | 16.15   |
|        | 3 mg/mL       | 35 nm     | 0.82         | 27.39                           | 70.36  | 15.87   |
|        | 4 mg/mL       | 51 nm     | 0.82         | 26.42                           | 69.39  | 15.05   |
|        | 5 mg/mL       | 79 nm     | 0.82         | 25.89                           | 68.16  | 14.47   |
| PDINO  | 1 mg/mL       | 8 nm      | 0.84         | 25.94                           | 72.63  | 15.79   |
|        | 2 mg/mL       | 12 nm     | 0.82         | 26.40                           | 70.41  | 15.26   |
|        | 3 mg/mL       | 26 nm     | 0.82         | 26.30                           | 68.31  | 14.75   |
|        | 4 mg/mL       | 46 nm     | 0.82         | 24.81                           | 64.91  | 13.13   |
|        | 5 mg/mL       | 64 nm     | 0.82         | 22.61                           | 61.03  | 11.31   |

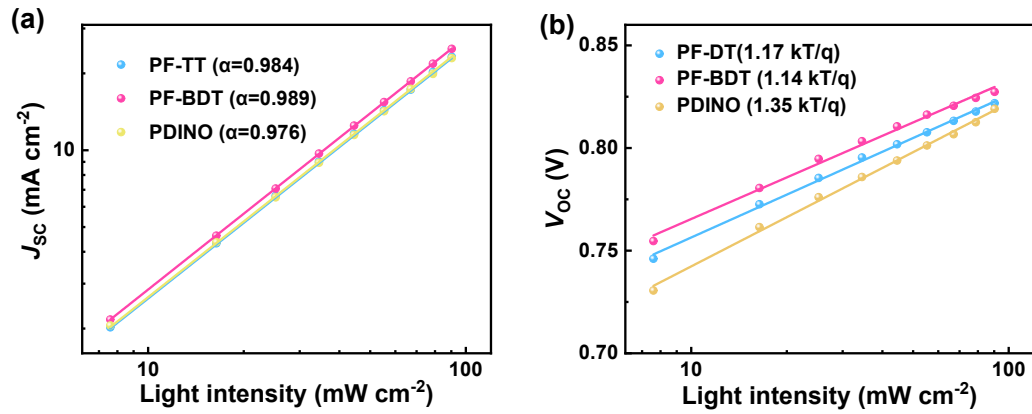

**Fig. S13** The dependence of (a)  $J_{sc}$  and (b)  $V_{oc}$  of the OSCs on the light intensity. They can be described according to the equations of  $J_{sc} \propto P_{light}^{\alpha}$  ( $\alpha$  represents the degree of recombination) and  $V_{oc} \propto nkT/q \ln P_{light}$  ( $k$ ,  $T$  and  $q$  represent Boltzmann constant, temperature in Kelvin and elementary charge), respectively.

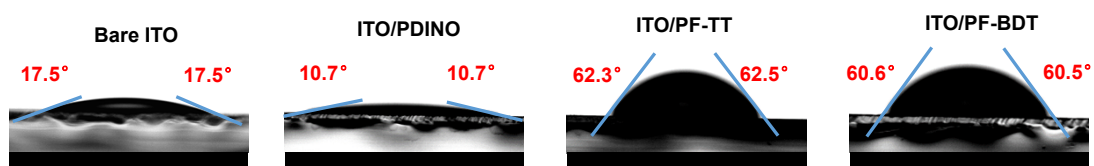

**Fig. S14** The contact angle measurements of different films to deionized water.

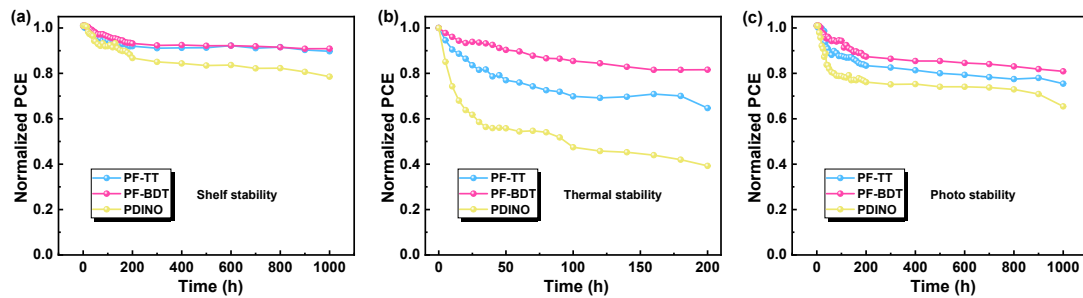

**Fig. S15** Normalized PCE degradation trend of the optimized non-fullerene OSCs with PF-TT, PF-BDT, and PDINO as CIL under different conditions: **(a)** stored in a  $N_2$ -filled glove-box (shelf stability), **(b)** continuously heated at  $85\text{ }^\circ\text{C}$  (thermal stability) and **(c)** exposed under the illumination of AM 1.5G,  $100\text{ mW/cm}^2$  with a white LED light in the glove box (photo stability).

**Table S5.** A summary of the photovoltaic parameters of reported non-fullerene OSCs using thick CILs (>30 nm) and the results in this work (Corresponding to **Fig. 6d**). The thickness-scaling loss of PCE is defined as  $\Delta\text{PCE}/\Delta t \times 100\%$  (%/nm).

| Active Layer      | CIL        | Thickness (nm) | $V_{oc}$ (V) | $J_{sc}$ ( $\text{mA} \cdot \text{cm}^{-2}$ ) | FF (%) | PCE (%) | thickness-scaling loss of PCE (%/nm) | Ref |
|-------------------|------------|----------------|--------------|-----------------------------------------------|--------|---------|--------------------------------------|-----|
| PTB7-Th: N2200    | PFN-2TNDI  | 5              | 0.92         | 16.59                                         | 70     | 10.8    | 4.64%                                | 1   |
|                   |            | 33             | 0.92         | 15.18                                         | 69     | 9.5     |                                      |     |
| PTB7-Th: IEICO-4F | P2G        | 5              | 0.71         | 23.6                                          | 62.2   | 10.5    | 3.76%                                | 2   |
|                   |            | 35             | 0.71         | 20.9                                          | 62.7   | 9.37    |                                      |     |
| PBDB-T: IT-M      | PDI-z      | 12             | 0.94         | 16.12                                         | 74.17  | 11.23   | 7.89%                                | 3   |
|                   |            | 40             | 0.90         | 15.01                                         | 66.78  | 9.02    |                                      |     |
| PBDB-T: ITIC      | PMI-TPP    | 13             | 0.87         | 15.90                                         | 69     | 9.56    | 0.45%                                | 4   |
|                   |            | 55             | 0.88         | 15.25                                         | 69     | 9.37    |                                      |     |
| PBDB-TDZ: IT-4F   | ATF        | 5              | 0.88         | 18.83                                         | 68.2   | 11.30   | 22.56%                               | 5   |
|                   |            | 50             | 0.53         | 5.10                                          | 42.5   | 1.15    |                                      |     |
|                   | STF        | 5              | 0.89         | 19.32                                         | 70.5   | 12.12   | 8.76%                                |     |
|                   |            | 50             | 0.87         | 16.02                                         | 58.7   | 8.18    |                                      |     |
|                   | OTF        | 5              | 0.88         | 19.89                                         | 74.6   | 13.21   | 8.22%                                |     |
|                   |            | 50             | 0.88         | 17.18                                         | 62.9   | 9.51    |                                      |     |
| PBDB-2Cl: ITIC-2F | PNDT       | 20             | 0.88         | 20.77                                         | 74.63  | 13.33   | 2.5%                                 | 6   |
|                   |            | 50             | 0.87         | 19.58                                         | 74.88  | 12.58   |                                      |     |
|                   | PNDOO      | 10             | 0.85         | 21.10                                         | 69.14  | 12.44   | 1.4%                                 |     |
|                   |            | 50             | 0.87         | 19.97                                         | 74.29  | 13.00   |                                      |     |
| PM6:IT-4F         | NDI-N      | 5              | 0.86         | 20.8                                          | 76.0   | 13.5    | 7.33%                                | 7   |
|                   |            | 50             | 0.86         | 15.9                                          | 74.0   | 10.2    |                                      |     |
| PTQ10: IDIC-2F    | PDINO-G    | 5              | 0.91         | 19.09                                         | 74.87  | 13.01   | 1.52%                                | 8   |
|                   |            | 32             | 0.91         | 18.76                                         | 73.72  | 12.60   |                                      |     |
| PM6: Y6           | PEDETA-DBO | 5              | 0.835        | 26.85                                         | 72.39  | 16.57   | 12.64%                               | 9   |
|                   |            | 30             | 0.816        | 24.22                                         | 65.83  | 13.41   |                                      |     |
| PM6:Y6            | PDINO      | 9              | 0.843        | 25.54                                         | 74.81  | 15.46   | 12.47%                               | 10  |
|                   |            | 39             | 0.834        | 19.76                                         | 71.12  | 11.72   |                                      |     |
| PM6:Y6            | NTA        | 11             | 0.849        | 26.72                                         | 74.3   | 16.86   | 12.88%                               | 11  |
|                   |            | 35             | 0.822        | 25.04                                         | 66.9   | 13.77   |                                      |     |
| PM6:Y6            | PDINOH     | 10             | 0.851        | 26.40                                         | 78.32  | 17.60   | 7.28%                                | 12  |
|                   |            | 53             | 0.830        | 24.77                                         | 70.39  | 14.47   |                                      |     |
| PM6:Y6            | NEA        | 8              | 0.873        | 24.94                                         | 69.1   | 15.04   | 12.07%                               | 13  |
|                   |            | 36             | 0.835        | 25.38                                         | 55.0   | 11.66   |                                      |     |
| PM6:Y6            | PTPAPDINO  | 14             | 0.83         | 25.49                                         | 74.10  | 13.01   | 2.93%                                | 14  |
|                   |            | 28             | 0.83         | 22.96                                         | 67.81  | 12.60   |                                      |     |
| PM6:Y6            | TOASiW12   | 8              | 0.85         | 25.42                                         | 74.7   | 16.14   | 18.56%                               | 15  |
|                   |            | 33             | 0.845        | 24.24                                         | 56.2   | 11.50   |                                      |     |

|              |              |    |       |       |       |       |        |           |
|--------------|--------------|----|-------|-------|-------|-------|--------|-----------|
| PM6:Y6       | PBI-2P       | 4  | 0.840 | 25.94 | 72.56 | 15.79 | 13.64% | 16        |
|              |              | 32 | 0.840 | 24.47 | 58.20 | 11.97 |        |           |
| PM6:Y6C12    | PDIN-EH      | 7  | 0.82  | 23.1  | 55.7  | 11.0  | 1.61%  | 17        |
|              |              | 38 | 0.83  | 22.5  | 54.8  | 10.5  |        |           |
| PM6:Y6       | PDINN-2F     | 10 | 0.84  | 26.31 | 76.1  | 16.82 | 7.16%  | 18        |
|              |              | 55 | 0.80  | 24.88 | 68.3  | 13.60 |        |           |
| PM6:Y6       | NDI-NI       | 8  | 0.84  | 25.74 | 73.93 | 16.06 | 2.38%  | 19        |
|              |              | 37 | 0.84  | 24.95 | 73.27 | 15.37 |        |           |
| PM6:Y6       | PNDIT-F3N-Br | 30 | 0.83  | 26.12 | 74.39 | 16.18 | 4.3%   | 20        |
|              |              | 60 | 0.83  | 25.17 | 71.07 | 14.89 |        |           |
| PM6:Y6       | SiNcTI-Br    | 4  | 0.860 | 26.8  | 76.0  | 17.5  | 6.88%  | 21        |
|              |              | 36 | 0.851 | 25.1  | 71.3  | 15.3  |        |           |
| PM6:Y6       | NDI-DABC     | 19 | 0.857 | 26.38 | 77.25 | 17.44 | 2.27%  | 22        |
|              |              | 41 | 0.849 | 26.28 | 75.86 | 16.94 |        |           |
| BTR-Cl:Y6    | PDINN:7%DOH  | 10 | 0.852 | 25.36 | 73.55 | 15.88 | 7.28%  | 23        |
|              |              | 50 | 0.830 | 22.11 | 70.68 | 12.97 |        |           |
| PM6: BTP-eC9 | t-PyPDINO    | 10 | 0.843 | 27.61 | 75.09 | 17.49 | 3.29%  | 24        |
|              |              | 45 | 0.840 | 26.69 | 72.89 | 16.34 |        |           |
|              | t-PyPDINBr   | 6  | 0.833 | 27.70 | 74.31 | 17.15 | 5.68%  |           |
|              |              | 53 | 0.827 | 24.10 | 72.59 | 14.48 |        |           |
| PM6:BTP-eC9  | PF-BDT       | 11 | 0.85  | 27.41 | 79.28 | 18.47 | 7.52%  | This Work |
|              |              | 53 | 0.82  | 26.48 | 70.05 | 15.31 |        |           |

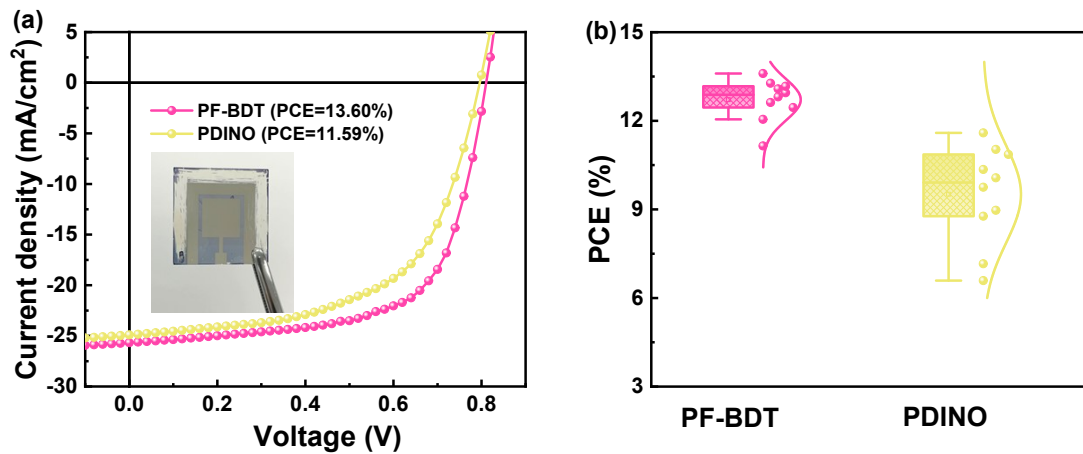

**Fig. S16 (a)**  $J$ - $V$  curves of the printable PM6:BTP-eC9-based non-fullerene OSCs with blade-coated PF-BDT ( $\sim 60$  nm) and PDINO ( $\sim 50$  nm) CIL. A physical map is inserted in the inset and the aperture area is 1 cm<sup>2</sup>. **(b)** PCE statistics distribution of 10 individual cells.



## References

1. Sun, C.; Wu, Z.; Hu, Z.; Xiao, J.; Zhao, W.; Li, H.-W.; Li, Q.-Y.; Tsang, S.-W.; Xu, Y.-X.; Zhang, K.; Yip, H.-L.; Hou, J.; Huang, F.; Y. Cao. Interface Design for High-efficiency Non-fullerene Polymer Solar Cells. *Energy Environ. Sci.* **2017**, *10*, 1784-1791.
2. Sharma, A.; Singh, S.; Song, X.; Villalva, D. R.; Troughton, J.; Corzo, D.; Toppare, L.; Gunbas, G.; Schroeder, B. C.; Baran, D. A Nonionic Alcohol Soluble Polymer Cathode Interlayer Enables Efficient Organic and Perovskite Solar Cells. *Chem. Mater.* **2021**, *33*, 8602-8611.
3. Xu, R.; Zhang, K.; Liu, X.; Jin, Y.; Jiang, X. F.; Xu, Q. H.; Huang, F.; Cao, Y. Alkali Salt-doped Highly Transparent and Thickness-insensitive Electron-transport Layer for High-performance Polymer Solar Cell. *ACS Appl. Mater. Interfaces*, **2018**, *10*, 1939-1947.
4. Qin, R.; Guo, D.; Hu, L.; Liu, Z.; Yang, J.; Liu, H.; Jiang, L.; Jiang, Y. Organic Solar Cells' Efficiency Enhanced by Perylene Monoimide Phosphorus Salt Cathode Interfacial Layer. *Energy Technol.*, **2020**, *8*, 2000072.
5. Wang, S.; Li, Z.; Xu, X.; Zhang, M.; Zhang, G.; Li, Y.; Peng, Q. Self-doping Small Molecular Conjugated Electrolytes Enabled by n-Type Side Chains for Highly Efficient Non-fullerene Polymer Solar Cells. *J. Mater. Chem. A* **2018**, *6*, 22503-22507.
6. Hu, Z.; Chen, Z.; Jing, J.; Liang, Y.; Bai, Y.; Liu, X.; Huang, F.; Cao, Y. Direct Arylation Polycondensed Conjugated Polyelectrolytes as Universal Electron Transport Layers for Highly Efficient Polymer Solar Cells. *J. Mater. Chem. C* **2020**, *8*, 15158-15167.
7. Kang, Q.; Ye, L.; Xu, B.; An, C.; Stuard, S. J.; Zhang, S.; Yao, H.; Ade, H.; Hou, J. A Printable Organic Cathode Interlayer Enables over 13% Efficiency for 1-cm<sup>2</sup> Organic Solar Cells. *Joule* **2019**, *3*, 227-239.
8. Pan, F.; Sun, C.; Li, Y.; Tang, D.; Zou, Y.; Li, X.; Bai, S.; Wei, X.; Lv, M.; Chen, X.; Li, Y. Solution-processable n-Doped Graphene-containing Cathode Interfacial Materials for High-performance Organic Solar Cells. *Energy Environ. Sci.* **2019**, *12*, 3400-3411.
9. Yu, Y.; Tao, W.; Wang, L.; Tao, Y. D.; Peng, Z.; Zheng, X.; Xiang, C.; Zhao, B.; Li C.-Z.; Tan, S. Non-conjugated Electrolytes as Thickness-insensitive Interfacial Layers for High-Performance Organic Solar Cells. *J. Mater. Chem. A*, **2021**, *9*, 22926-22933.

10. Cai, C.; Yao, J.; Chen, L.; Yuan, Z.; Zhang, Z. G.; Hu, Y.; Zhao, X.; Zhang, Y.; Chen, Y.; Li, Y. Silicon Naphthalocyanine Tetraimides: Cathode Interlayer Materials for Highly Efficient Organic Solar Cells. *Angew. Chem., Int. Ed.* **2021**, *60*, 19053-19057.
11. Zhao, Y.; Liu, X.; Jing, X.; Liu, S.; Liu, H.; Liu, Y.; Yu, L.; Dai, S.; Sun, M. Multi-armed Imide-based Molecules Promote Interfacial Charge Transfer for Efficient Organic Solar Cells. *Chem. Eng. J.* **2022**, *441*, 135894.
12. Zi, M.; Chen, X.; Tan, S.; Weng, C.; Zhao, B. Organic Solar Cells with Efficiency of 17.6% and Fill Factor of 78.3% based on Perylene-diimide Derivative as Cathode Interface Layer. *Chem. Eng. J.* **2022**, *443*, 136455.
13. Zhao, Y.; Liu, Y.; Liu, X.; Kang, X.; Yu, L.; Dai, S.; Sun, M. Aminonaphthalimide-Based Molecular Cathode Interlayers for As-Cast Organic Solar Cells. *Chem. Sus. Chem.* **2021**, *14*, 4783-4792.
14. Zhou, D.; You, W.; Yang, F.; Chen, R.; Xu, H.; Tong, Y.; Hu, B.; Hu, Lin.; Xie, Y.; Chen, L. N-type Self-doped Hyperbranched Conjugated Polyelectrolyte as Electron Transport Layer for Efficient Nonfullerene Organic Solar Cells. *ACS Appl. Mater. Interfaces*, **2021**, *13*, 50187-50196.
15. Qiu, J.; Zhang, Y.; Liu, Y.; Liu, H.; Xia, D.; Yang, F.; Zhao, C.; Li, W.; Wu, L.; Li, F. Surfactant-Encapsulated Polyoxometalate Complex as a Cathode Interlayer for Nonfullerene Polymer Solar Cells. *CCS Chem.* **2022**, *4*, 975-986.
16. Wen, X.; Zhang, Y.; Xie, G.; Rausch, R.; Tang, N.; Zheng, N.; Liu, L.; Würthner, F.; Xie, Z. Phenol-Functionalized Perylene Bisimides as Amine-Free Electron Transporting Interlayers for Stable Nonfullerene Organic Solar Cells. *Adv. Funct. Mater.* **2022**, *32*, 2111706.
17. Hoff, A.; Gasonoo, A.; Pahlevani, M.; Welch, G. C. An Alcohol-Soluble N-Annulated Perylene Diimide Cathode Interlayer for Air-Processed, Slot-Die Coated Organic Photovoltaic Devices and Large-Area Modules. *Sol. RRL*, **2022**, *6*, 2200691.
18. Yao, J.; Ding, S.; Zhang, R.; Bai, Y.; Zhou, Q.; Meng, L.; Solano, E.; Steele, J. A.; Roeffaers, M. B. J.; Gao, F.; Zhang, Z. G.; Li, Y. Fluorinated Perylene-Diimides: Cathode Interlayers Facilitating Carrier Collection for High-Performance Organic Solar Cells. *Adv. Mater.* **2022**, *34*, 2203690.

19. Liu, M.; Fan, P.; Hu, Q.; Russell, T. P.; Liu, Y. Naphthalene-Diimide-based Ionenenes as Universal Interlayers for Efficient Organic Solar Cells. *Angew. Chem. Int. Ed.* **2020**, *59*, 18131-18135.
20. Tian, L.; Jing, J.; Tang, H.; Liang, Y.; Hu, Z.; Rafiq, M.; Huang, F.; Cao, Y. Aldol Condensation-Polymerized n-Doped Conjugated Polyelectrolytes for High-Performance Nonfullerene Polymer Solar Cells. *Sol. RRL*, **2020**, *5*, 2000523.
21. Qin, Y.; Chang, Y.; Zhu, X.; Gu, X.; Guo, L.; Zhang, Y.; Wang, Q.; Zhang, J.; Zhang, X.; Liu, X.; Lu, K.; Zhou, E.; Wei, Z.; Sun, X. 18.4% Efficiency Achieved by the Cathode Interface Engineering in Non-fullerene Polymer Solar Cells. *Nano Today*, **2021**, *41*, 101289
22. You, Z.; Song, Y.; Liu, W.; Wang, W.; Zhu, C.; Duan, Y.; Liu, Y. Diazabicyclic Electroactive Ionenenes for Efficient and Stable Organic Solar Cells. *Angew. Chem. Int. Ed.* **2023**, *62*, e202302538
23. Cao, L.; Du, X.; Li, X.; He, Z.; Lin, H.; Zheng, C.; Yang, G.; Chen, Z.; Tao, S. Hydrogen Bond-Induced Cathode Engineering Enables Binary All-Small-Molecule Organic Solar Cells with 15.88% Efficiency and Enhanced Thermostability. *Sol. RRL*, **2022**, *6*, 2200477.
24. Sun, W. J.; Wang, Y. T.; Zhang, Y.; Sun, B.; Zhang, Z. Q.; Xiao, M. J.; Li, X. Y.; Huo, Y.; Xin, J.; Zhu, Q.; Ma, W.; Zhang, H. L. A Cathode Interface Layer Based on 4, 5, 9, 10-Pyrene Diimide for Highly Efficient Binary Organic Solar Cells. *Angew. Chem. Int. Ed.* **2022**, *61*, e202208383.
